# Supplementary material for: Perceptions of medical dramas among Palestinian medical students: A cross-sectional study
Source: Research Square preprint supplement (doi:10.21203/rs.3.rs-7667692/v1), 2025-11-26
Supplement: Supplementary file 1 [file 4177d92f86dbb73825e38e9b.docx]

| **Consent Form:**  This study aims to explore the perceptions of Palestinian medical students toward medical dramas and how these shows influence their understanding of medical ethics, professionalism, realism, and future career perspectives.  **Voluntary Participation:**  Participation is completely voluntary. You may skip any question or withdraw from the study at any time without penalty.  **Confidentiality:**  All responses will be anonymized and kept strictly confidential. The data collected will be used solely for research purposes and stored securely.  **Duration:**  Completing the questionnaire will take approximately within 3- 4 minutes.  **Contact Information:**   If you have any questions about the study, please contact the research team at (bessandabbas661@gmail.com /00972592549558).  By proceeding to complete this questionnaire, you are indicating your informed consent to participate in this study. ( yes).  Thank you for your time and valuable contribution.  This revised questionnaire is designed to gather information on the perceptions of Palestinian medical students regarding medical dramas, and how such shows may influence their views on medical ethics, professionalism, realism in clinical settings, and their career perspectives | |
| --- | --- |
| **Perceptions of medical dramas among Palestinian medical students : A cross-sectional study** | |
| **Demographic details (Section A)** | |
| **Age: ____ years** | |
| Gender | -( ) Female  -( ) male |
| What is your University ? | -( ) Palestine Polytechnic University  -( ) An-Najah National University  -( ) Al-Quds University  -( ) Hebron University  -( ) Arab American University |
| What year of medical school are you currently in? | -( )1st  -( )2nd  -( )3rd  -( )4th  -( )5th  -( )6th  -Intern |
| **Section 2: medical drama Viewing Habits** | |
| Have you watched any drama programs in the past year? | -( ) Yes  -( ) No |
| Have you ever watched a medical drama (e.g., Grey's Anatomy, House M.D., The Good  Doctor)? | -( ) Yes  -( ) No |
| **This part continues the questions for those who watch medical dramas** | |
| Approximately how many seasons or episodes of medical drama shows have you watched in total? | -( ) Less than one season  -( ) 1–3 seasons-( ) 4–6 seasons  -( ) More than 6 seasons |
| How often do you watch a medical drama program weekly? | -( ) Less than once a week-( ) 1-3 times per week  -( ) 4-6 times per week  -( ) More than 6 times per week |
| Do you watch medical dramas with friends? | -( ) No, mostly by myself  -( ) Yes, with non-medical student friends  -( ) Yes, with medical student friends |
| Do you think medical dramas influence the public perception of doctors | -( ) Yes  -( ) No  -( ) Maybe |
| Have medical drama shows ever influenced your interest in a specific medical specialty? | -( ) Yes  -( ) No  If yes, please specify:………….. |
| To what extent do you think the clinical scenes in medical dramas reflect real-life medical  practice? (1 = Not realistic at all, 5 = Very realistic) | -( ) 1  -( ) 2  -( ) 3  _( ) 4  -( ) 5 |
| Do you think that medical dramas accurately depict ethical issues that arise in clinical  practice? (1 = Least accurate, 5 = Most accurate) | -( ) 1  -( ) 2  -( ) 3  -( ) 4  -( ) 5 |

| **Section 3: Perceptions of Medical Dramas (Regarding Ethics, Professionalism, and Realism)** | | | |
| --- | --- | --- | --- |
| In your opinion, how well are the following ethical and medical issues handled/presented in medical  medical dramas? | | | |
|  | Poorly presented | Well presented | Don’t Remember/Not  Applicable |
| Rationing of Care |  |  |  |
| Medical Mistakes |  |  |  |
| Infectious Diseases |  |  |  |
| Quality of Life |  |  |  |
| Professional Misconduct |  |  |  |
| Confdentiality |  |  |  |
| Death and Dying |  |  |  |

| Based on your experience watching medical dramas, how often do the following professional behaviors appear?  (Please rate how frequently you have seen each behavior portrayed, regardless of whether it was shown positively or negatively)  (1 = Never seen, 5 = Very frequently seen) | | | | | |
| --- | --- | --- | --- | --- | --- |
|  | 1(Never seen) | 2 | 3 | 4 | 5 |
| Doctors admitting their mistakes  (Accountability) |  |  |  |  |  |
| Doctors showing respect to patients and staff  (Respect) |  |  |  |  |  |
| Doctors taking leadership in medical team  (Leadership) |  |  |  |  |  |
| Doctors fulfilling duties under pressure  (Responsibility) |  |  |  |  |  |

| Have friends or family members ever asked for your opinion on a bioethical issue they have seen on medical dramas? | -( ) Yes  -( ) No |
| --- | --- |
| Do you discuss the ethical issues raised in medical television shows with your friends? | -( )Yes  -( )No |

| **Section 4: Psychological and Behavioral Impact of Medical Dramas** | | | | | |
| --- | --- | --- | --- | --- | --- |
| Please indicate your level of agreement with the following statements:  (1 = Strongly Disagree, 5= Strongly Agree) | | | | | |
|  | 1 | 2 | 3 | 4 | 5 |
| This show made me feel anxious or fearful  about the medical profession. |  |  |  |  |  |
| Watching medical dramas helped reduce  my personal stress or anxiety |  |  |  |  |  |
| Emotional scenes (e.g., death, failure, tough  decisions) affect me deeply |  |  |  |  |  |
| Medical dramas have given me hope or  motivation to continue studying medicine. |  |  |  |  |  |
| These shows increased my empathy  towards patients and their families. |  |  |  |  |  |
| I find myself comparing real clinical  experiences to what I’ve seen in medical  dramas. |  |  |  |  |  |
| Medical dramas exaggerate the emotional  stress doctors face in real life. |  |  |  |  |  |
| I have reacted emotionally (e.g., cried, got  nervous, angry) while watching a medical  drama |  |  |  |  |  |
| Medical dramas shaped my view of the  doctor–patient relationship |  |  |  |  |  |
| I wish real hospitals were like the ones  shown in medical dramas. |  |  |  |  |  |
| I have learned a medical fact or clinical skill  from a medical dramas. |  |  |  |  |  |

| **Section 5: Bioethical Knowledge and Sources** | | | |
| --- | --- | --- | --- |
| Have you had previous formal exposure to bioethics? | | -( ) Never  -( )Through an undergraduate course (e.g., Medical Ethics, Bioethics)  -( )Through a required medical course (e.g., specifc module within a medical subject)  -( )Others………………… | |
| How important are the following sources in informing your understanding of bioethical issues? | | | |
|  | Less important | | Most important |
| medical dramas |  | |  |
| Family |  | |  |
| Friends |  | |  |
| Magazines/Online News |  | |  |
| Medical school curriculum |  | |  |
| Newspapers |  | |  |
| Religious values/Teachings |  | |  |
| Scholarly journals/Articles |  | |  |
| Social Media |  | |  |
